# Supplementary material for: Fludarabine and rituximab with escalating doses of lenalidomide followed by lenalidomide/rituximab maintenance in previously untreated chronic lymphocytic leukaemia (CLL): the REVLIRIT CLL-5 AGMT phase I/II study
Source: PubMed Central journal article supplement (PMC6097797; doi:10.1007/s00277-018-3380-z), 2018-06-04
Supplement: 277_2018_3380_MOESM1_ESM.pdf [file 277_2018_3380_MOESM1_ESM.pdf]

## Supporting information

The file contains a table with statistical analyses showing effects of analysed risk factors on survival endpoints, it also contains a schematic depiction of the trial treatment for better illustration and a graph showing the timing of occurrence of dose limiting toxicities, showing the early dominance of non-hematologic toxicities.

### Supplementary table

Table S1.

|                                     | PFS    |            |          | OS     |            |          |
|-------------------------------------|--------|------------|----------|--------|------------|----------|
|                                     | Exp(B) | 95% CI     | p value* | Exp(B) | 95% CI     | p value* |
| Gene mutations                      |        |            |          |        |            |          |
| <i>ATM</i> (yes vs no)              | 1.86   | 0.80-4.34  | 0.14     | 0.80   | 0.21-2.99  | 0.74     |
| <i>BIRC3</i> (yes vs no)            | 2.43   | 0.56-10.54 | 0.22     | 2.52   | 0.31-20.42 | 0.37     |
| <i>NFKB1E</i> (yes vs no)           | 1.31   | 0.39-4.43  | 0.66     | 2.84   | 0.71-11.35 | 0.12     |
| <i>NOTCH1</i> (yes vs no)           | 2.03   | 0.88-4.72  | 0.092    | 3.75   | 1.00-14.02 | 0.035    |
| <i>SF3B1</i> (yes vs no)            | 0.41   | 0.06-3.05  | 0.37     | 0.97   | 0.12-7.80  | 0.98     |
| <i>TP53</i> (yes vs no)             | 2.39   | 0.55-10.32 | 0.23     | 13.55  | 2.40-76.63 | <0.0001  |
| <i>ZNF292</i> (yes vs no)           | 1.10   | 0.33-3.74  | 0.87     | 1.91   | 0.39-9.29  | 0.42     |
| FISH cytogenetics                   |        |            |          |        |            |          |
| (high risk vs low risk)**           | 2.33   | 1.03-5.26  | 0.037    | 1.94   | 0.25-7.30  | 0.32     |
| IgVH (unmutated vs mutated)         | 3.90   | 1.41-10.80 | 0.005    | 5.27   | 0.64-43.13 | 0.084    |
| ≥2 mutations (yes vs no)            | 3.35   | 1.00-0.07  | 0.051    | 4.06   | 1.01-16.26 | 0.032    |
| MRD neg after induction (yes vs no) | 0.33   | 0.14-0.77  | 0.007    | 0.53   | 0.12-2.39  | 0.40     |

\*(Log Rank (Mantel-Cox))

\*\* high risk defined by presence of del 17p and/or del11q, low risk defined as non-high risk

### Supplementary figures

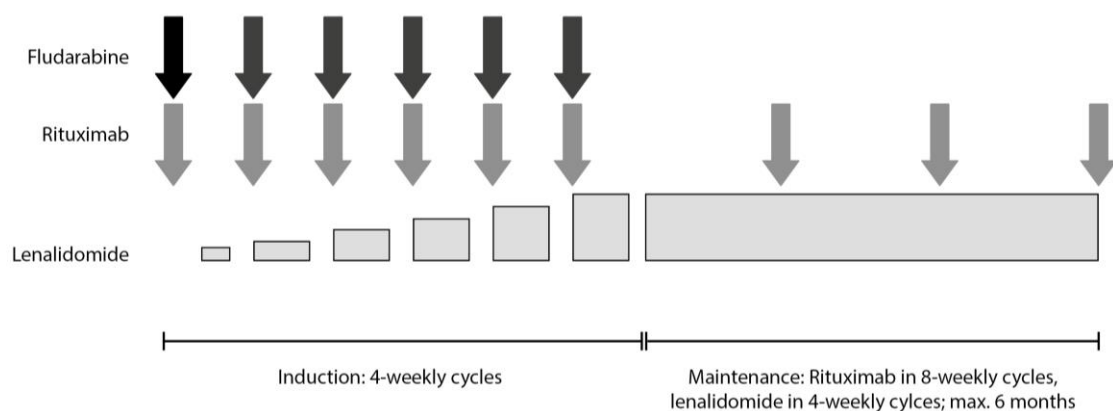

Figure S1. Trial design.

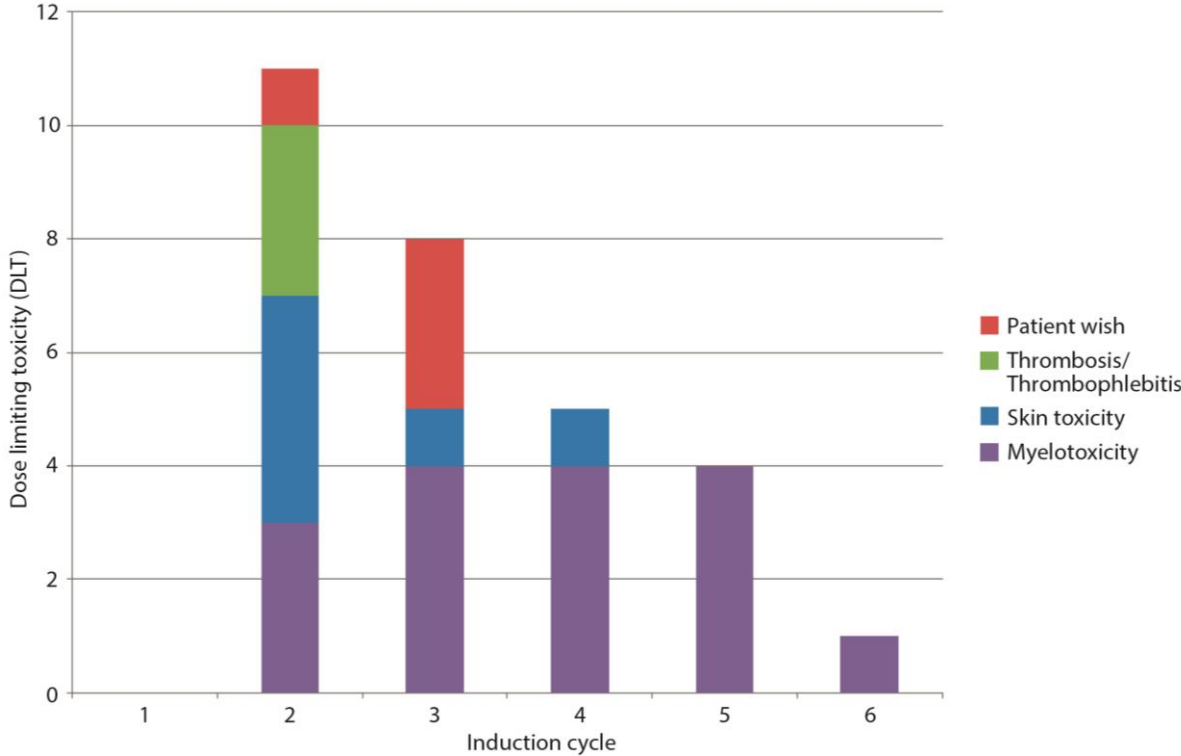

Figure S2. Occurrence of first dose limiting toxicity (DLT) per patient, as assessed at the end of treatment cycle (induction).
